# Supplementary material for: Divergent Evolutionary and Expression Patterns between Lineage Specific New Duplicate Genes and Their Parental Paralogs in Arabidopsis thaliana
Source: PLOS journal article supplement (doi:10.1371/journal.pone.0072362), 2013-08-29
Supplement: S10 (10.1371/journal.pone.0072362.s010) [file journal.pone.0072362.s010]

Table S5 The population genetics statistics of 10 datasets of 100 duplicated genes

| Average value | $\pi_a$    | $\pi_s$    | $\pi_n$    | $\theta_a$ | $\theta_s$ | $\theta_n$ |
|---------------|------------|------------|------------|------------|------------|------------|
| New gene      | 0.0054     | 0.0069     | 0.0039     | 0.0082     | 0.0101     | 0.0063     |
| Parental gene | 0.0049     | 0.0071     | 0.0029     | 0.0071     | 0.0094     | 0.0047     |
| sample 1      | 0.00449173 | 0.00594974 | 0.00228627 | 0.00686558 | 0.0087851  | 0.00411626 |
| sample 2      | 0.00515072 | 0.00739725 | 0.00273935 | 0.00753609 | 0.0101769  | 0.0046137  |
| sample 3      | 0.00490263 | 0.0069705  | 0.00250598 | 0.00647769 | 0.00875752 | 0.00359099 |
| sample 4      | 0.00495274 | 0.00704691 | 0.00264337 | 0.00705613 | 0.0093396  | 0.00432585 |
| sample 5      | 0.00457513 | 0.00632639 | 0.0026556  | 0.00643609 | 0.00838442 | 0.00422199 |
| sample 6      | 0.00581255 | 0.00835327 | 0.00307861 | 0.00793308 | 0.0108007  | 0.00489298 |
| sample 7      | 0.00518072 | 0.00716777 | 0.0028966  | 0.00672731 | 0.00883408 | 0.00400616 |
| sample 8      | 0.00482176 | 0.00704361 | 0.00293806 | 0.0073318  | 0.00992737 | 0.00488768 |
| sample 9      | 0.00444942 | 0.00622852 | 0.0023335  | 0.00690004 | 0.00915023 | 0.00426901 |
| sample 10     | 0.00508905 | 0.00706294 | 0.00281498 | 0.00738926 | 0.00977141 | 0.00459003 |
